# Supplementary material for: Characterization of zebrafish rod and cone photoresponses
Source: Research Square preprint supplement (doi:10.21203/rs.3.rs-5984163/v1), 2025-03-12
Supplement: Supplementary file 1 [file f1885fb64f0155df9fff7dbf.docx]

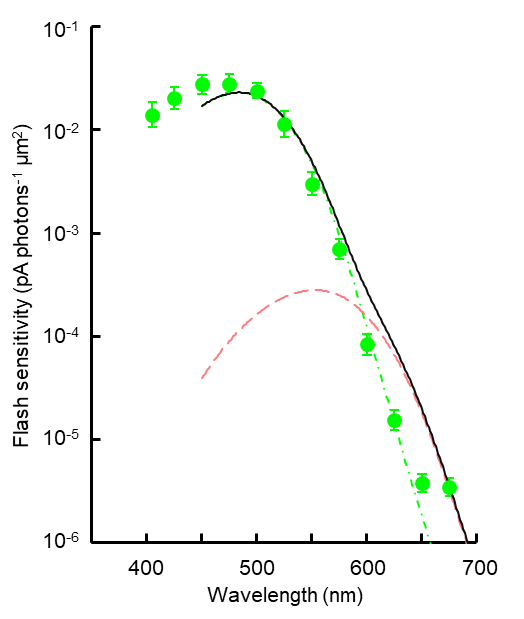
**Supplementary Information**

**Supplemental Figure S1** Spectral sensitivity plots of green-sensitive cones fitted with red and green mixed spectral template. Green (λmax 484 nm) and red (553 nm) spectral templates were mixed with scaling factors of 2.29 × 10-2 and 2.80 × 10-4, respectively. However, the curve did not fit well to the plots.

**
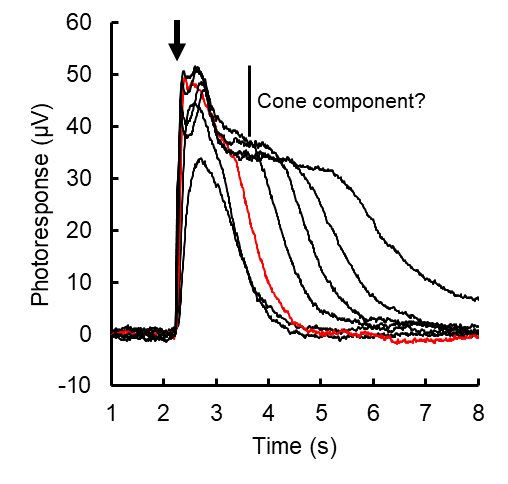
Supplemental Figure S2** Waveform of rod-cone mixed responses after subtracting isolated cone component (Fig. 6c). Flash intensity: 32 to 32000 photons µm-2, Red: 320 photons µm-2. Timing of the test flash is shown by an arrow. Cone response-like bumps are still observed on the rod response plateau indicating incomplete rod-cone response separation.
